# Supplementary material for: Superconducting diode effect via conformal-mapped nanoholes
Source: PubMed Central journal article supplement (PMC8113273; doi:10.1038/s41467-021-23077-0), 2021-05-11
Supplement: 41467_2021_23077_MOESM1_ESM.pdf [file 41467_2021_23077_MOESM1_ESM.pdf]

## Supplementary Information

### Superconducting diode effect via conformal-mapped nanoholes

Yang-Yang Lyu<sup>1,2,+</sup>, Ji Jiang<sup>3,4,+</sup>, Yong-Lei Wang<sup>1,\*</sup>, Zhi-Li Xiao<sup>2,5,\*</sup>, Sining Dong<sup>1</sup>, Qing-Hu Chen<sup>3</sup>, Milorad V. Milošević<sup>4</sup>, Huabing Wang<sup>1,6</sup>, Ralu Divan<sup>7</sup>, John E. Pearson<sup>2</sup>, Peiheng Wu<sup>1,6</sup>, Francois M. Peeters<sup>4</sup> and Wai-Kwong Kwok<sup>2</sup>

<sup>1</sup>*Research Institute of Superconductor Electronics, School of Electronic Science and Engineering, Nanjing University, Nanjing 210023, China*

<sup>2</sup>*Materials Science Division, Argonne National Laboratory, Argonne, Illinois 60439, USA*

<sup>3</sup>*Department of Physics, Zhejiang University, Hangzhou, China*

<sup>4</sup>*NANOLab Center of Excellence and Department of Physics, University of Antwerp, Antwerp, Belgium*

<sup>5</sup>*Department of Physics, Northern Illinois University, DeKalb, Illinois 60115, USA*

<sup>6</sup>*Purple Mountain Laboratories, Nanjing 211111, China*

<sup>7</sup>*Center for Nanoscale Materials, Argonne National Laboratory, Argonne, Illinois 60439, USA*

+ Authors contribute equally

\* Correspondence to: [yongleiwang@nju.edu.cn](mailto:yongleiwang@nju.edu.cn); [xiao@anl.gov](mailto:xiao@anl.gov);

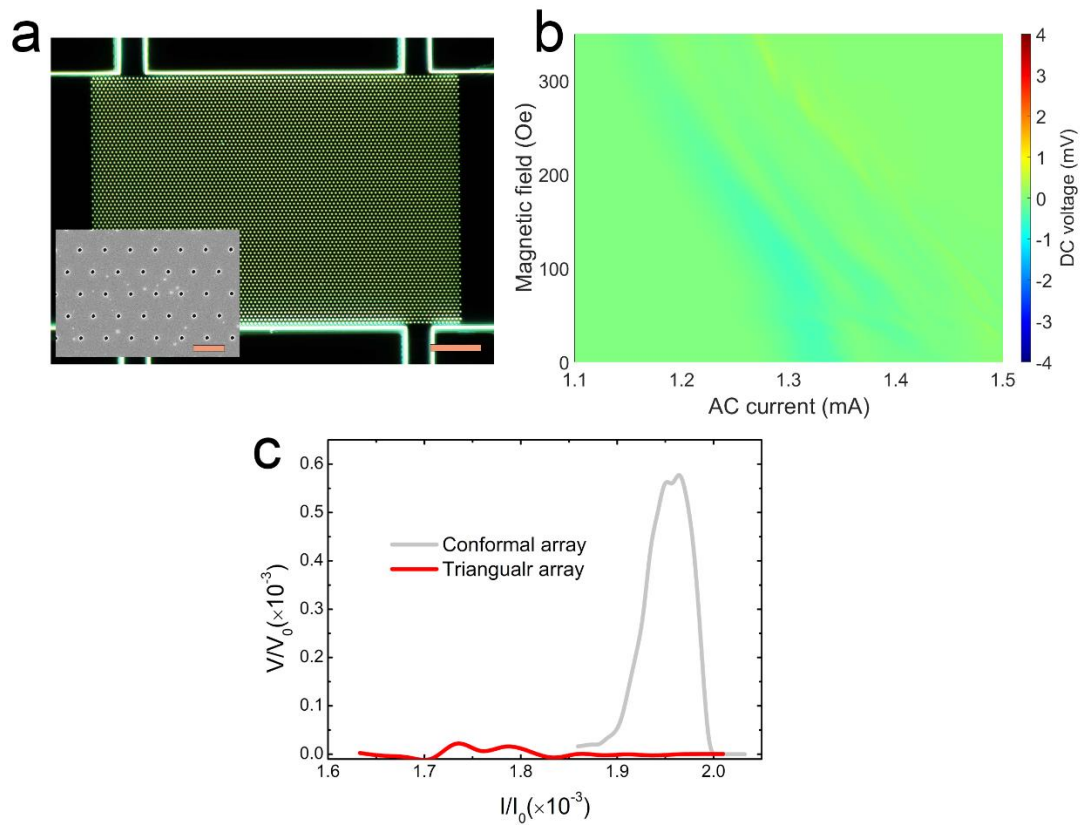

**Supplementary Fig. 1 | Results for section TRI with triangular array of nano-holes.**

**a**, Dark-field optical image of the TRI section in Fig. 1a. Scale bar, 10  $\mu\text{m}$ . The inset is a SEM image of the nano-holes with a nominal diameter of 110 nm. Scale bar of inset, 1  $\mu\text{m}$ . **b**, Color map (experimental results) of the magnetic field and AC current dependent DC voltages obtained from section TRI, displaying negligible rectification. **c**, Simulated rectification signals for a sample with nano-holes in a triangular array. The rectification is nearly absent compared to the sample with nano-holes in a conformal array, and consistent with the experimental observation.

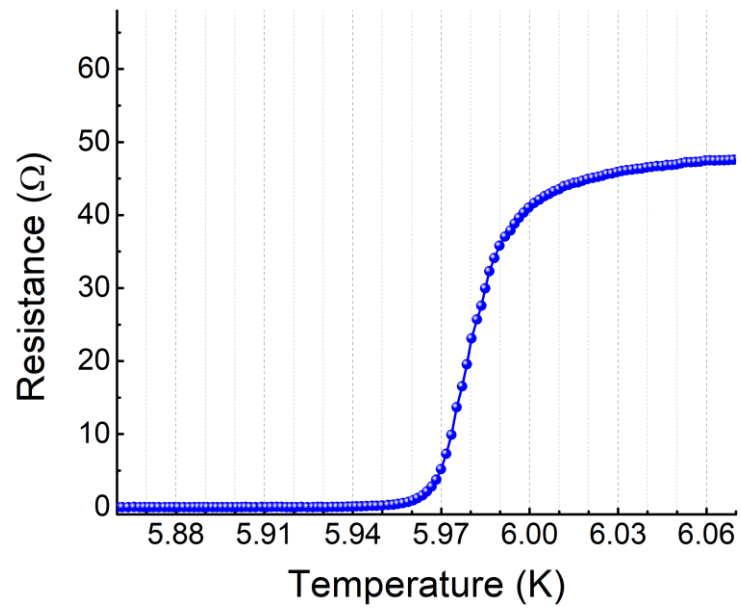

**Supplementary Fig. 2 | Superconducting transition of the MoGe film.** The resistance versus temperature curve shows an onset transition temperature of ~6 K.

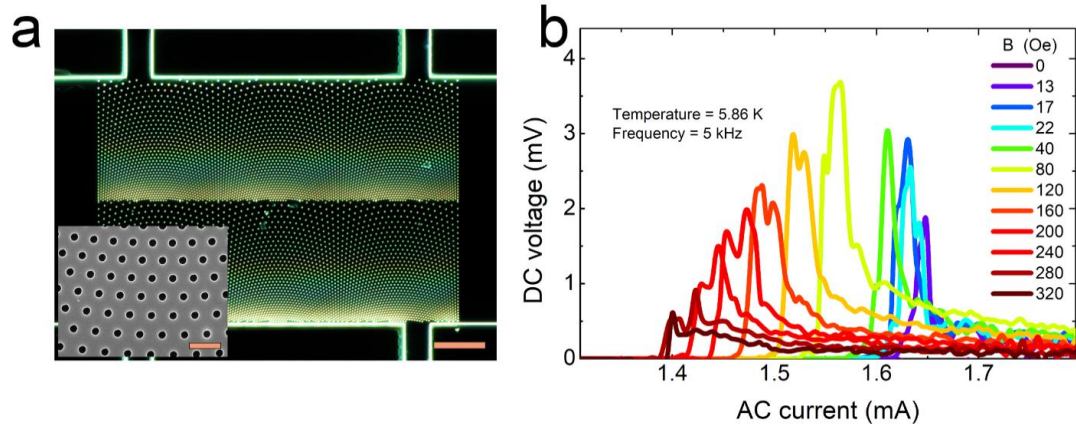

**Supplementary Fig. 3 | Rectification effect for a sample with a nominal hole diameter of 220 nm. a,** Dark field optical image of the sample. Scale bar, 10  $\mu\text{m}$ . The inset is a SEM image of the nanoholes with diameter of  $\sim 220$  nm. Scale bar of inset, 1  $\mu\text{m}$ . **b,** Curves of the magnetic field and AC current dependent DC voltages. The maximal rectification signal occurs around the magnetic field of  $\sim 80$  Oe, which corresponds to a flux-quantum density that is twice the average hole density.

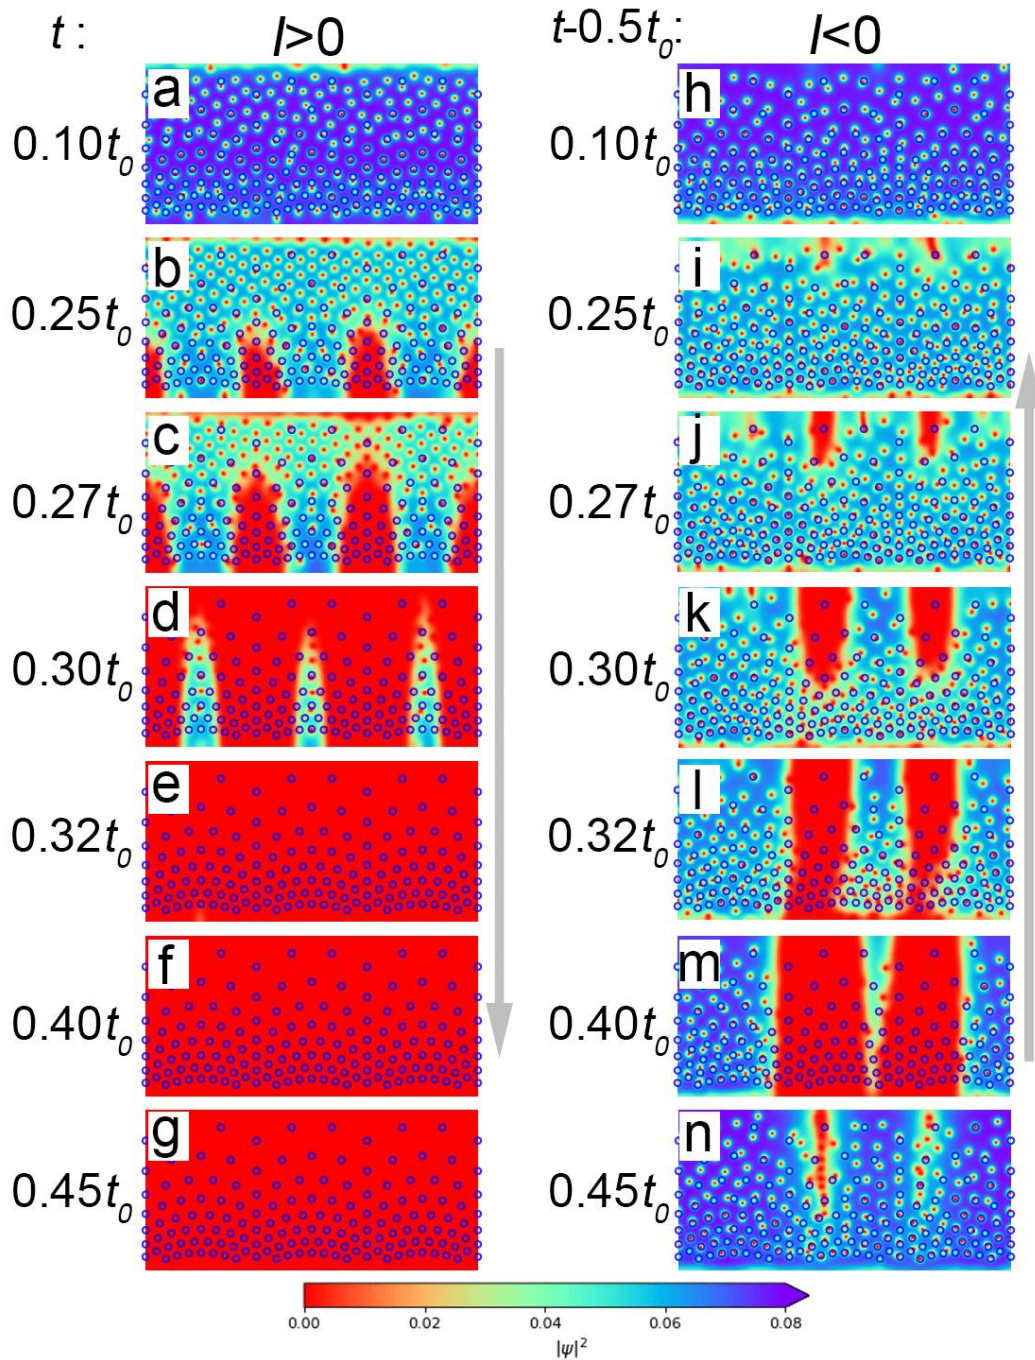

**Supplementary Fig. 4 | Nonreciprocal superconducting-to-normal transitions.**

Screenshots of superconducting Cooper-pair density from Video 1 at various instances  $t$  ( $t_0$  is the period of the sine wave AC current). **a-g**, in 1<sup>st</sup> half period with  $I > 0$ . **h-n**, in the 2<sup>nd</sup> half period with  $I < 0$ . Blue indicates superconducting state, while red indicates normal state. Gray arrows denote the direction of flux motion.

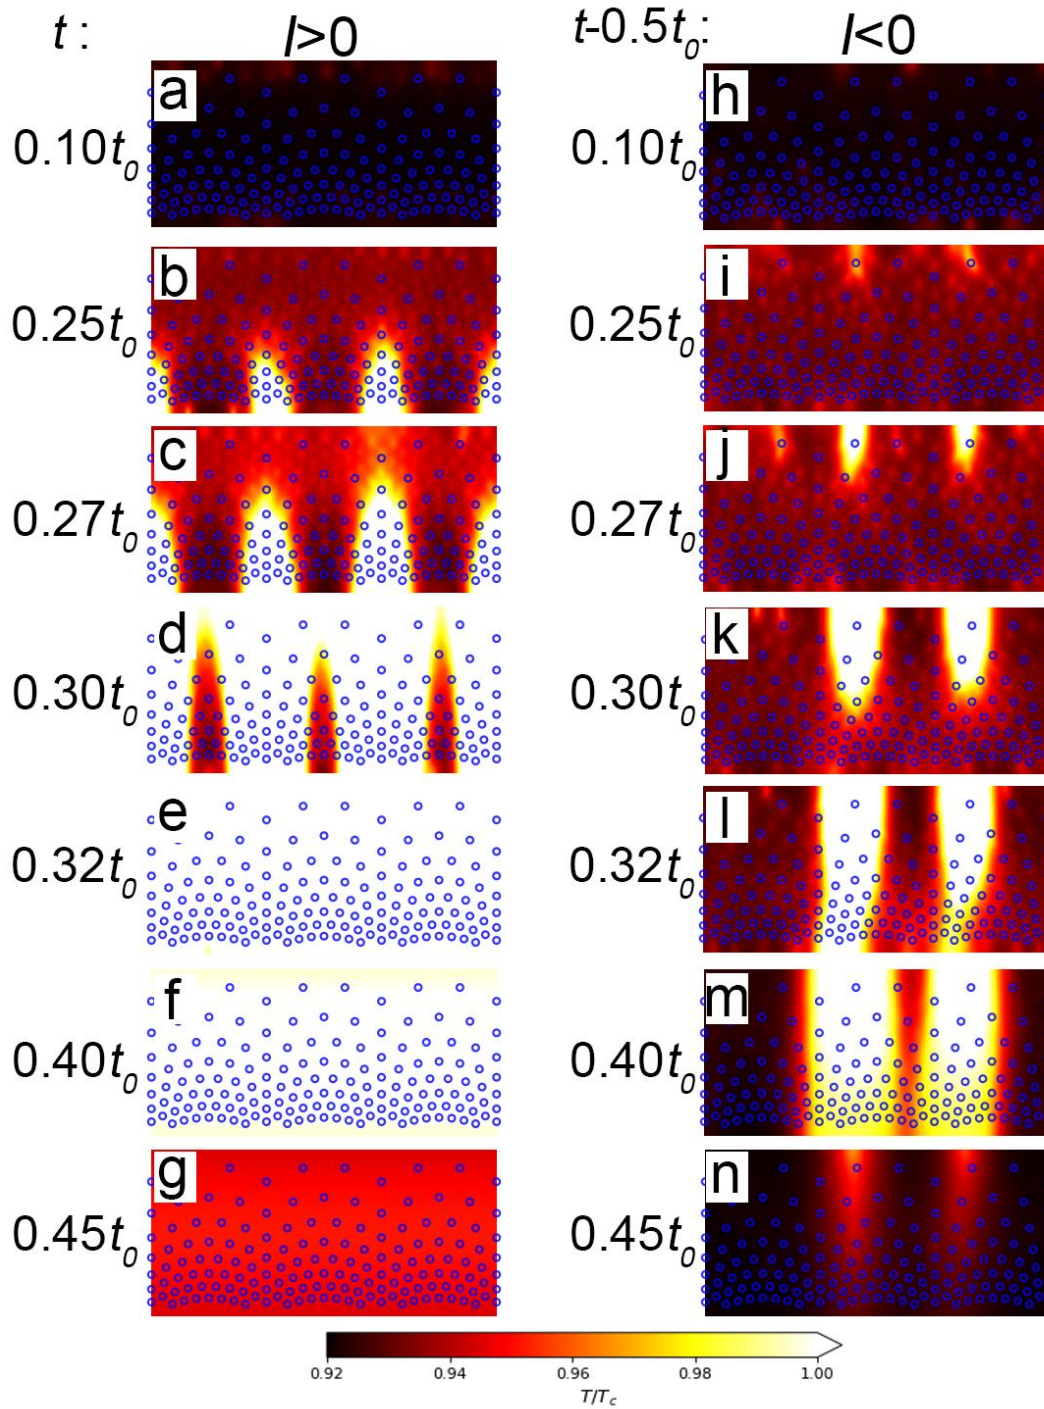

**Supplementary Fig. 5 | Nonequivalent nucleation and evolution of hot spots.**

Screenshots of temperature maps obtained from Video 2 at various instances  $t$  ( $t_0$  is the period of sine wave AC current). **a-g**, in the 1<sup>st</sup> half period with  $I > 0$ . **h-n**, in the 2<sup>nd</sup> half period with  $I < 0$ . White indicates high temperature, while dark color indicates low temperature.

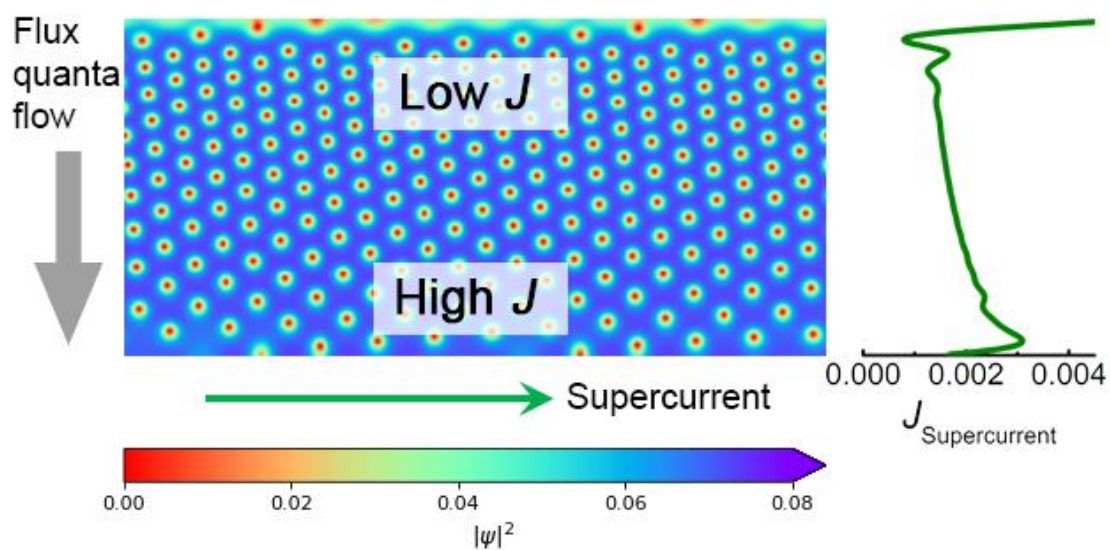

**Supplementary Fig. 6 | Dynamic distribution of flux-quanta and asymmetric supercurrent density in a pristine sample.** The dynamic distribution mapping of flowing flux-quanta driven by supercurrent is obtained from a screenshot of Video 3. Green and gray arrows indicate the direction of current and flux-flow, respectively. The bottom region of the fluxonic map has a higher supercurrent density, a faster flux-flow with a lower flux density as compared to those in the top region. Right panel depicts distribution of supercurrent density along the vertical direction.

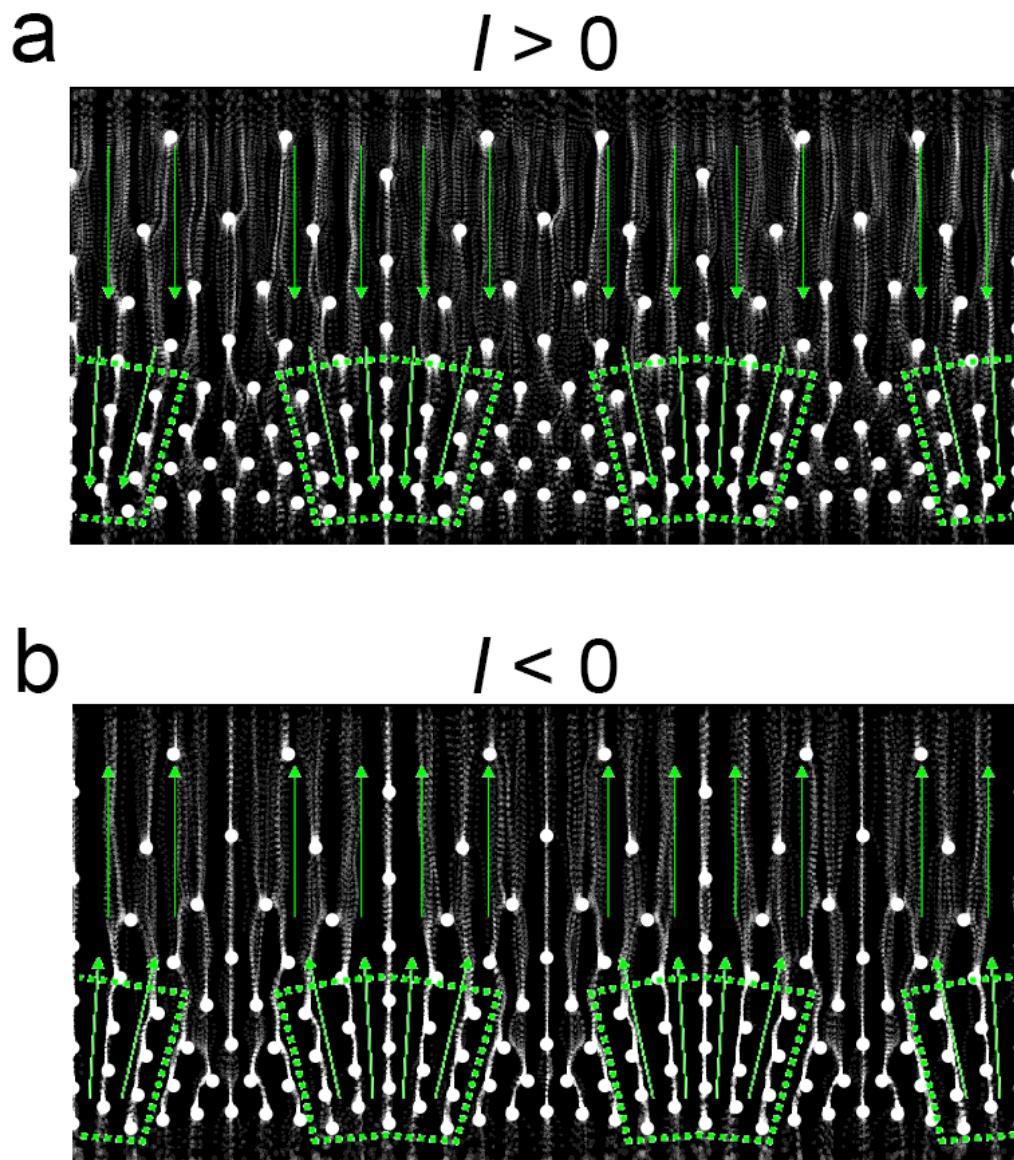

**Supplementary Fig. 7 | Trajectories of flux-quanta.** **a** and **b**, fluxonic trajectory map under positive (a) and negative (b) current, respectively. White dots show the positions of the nanoholes. White lines are single flux-quantum trajectories. Green arrows depict the direction of flux-quantum motion. The dotted fans highlight the areas with strong flux funneling effect.



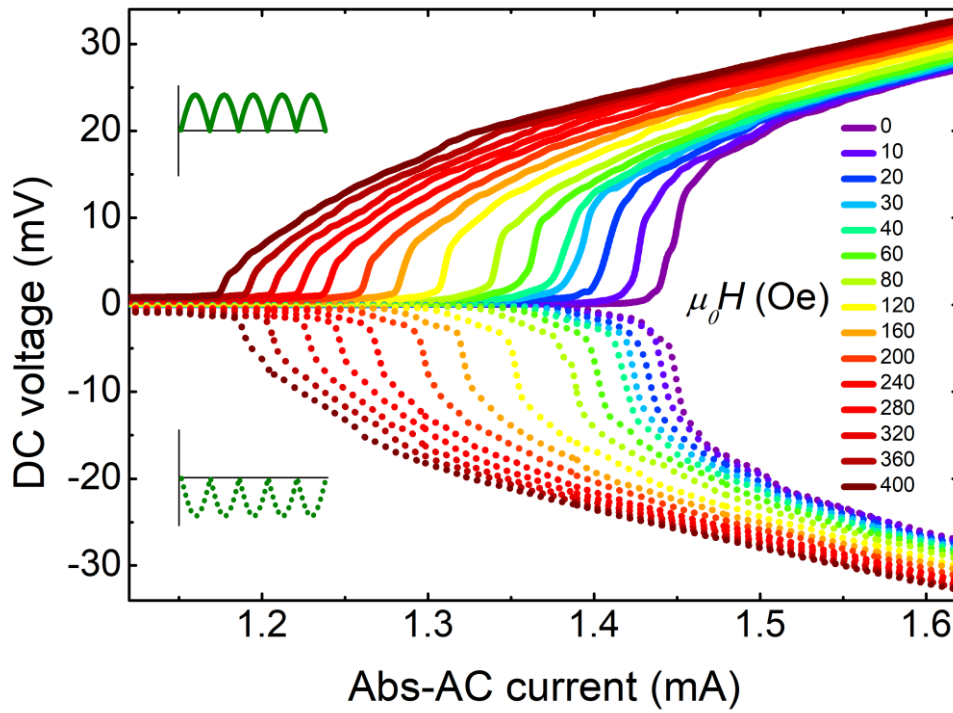

**Supplementary Fig. 8 | Magnetic field dependent quasi-DC experiments.** The measurements were conducted using quasi-DC currents with Abs-AC waveforms shown in the insets.

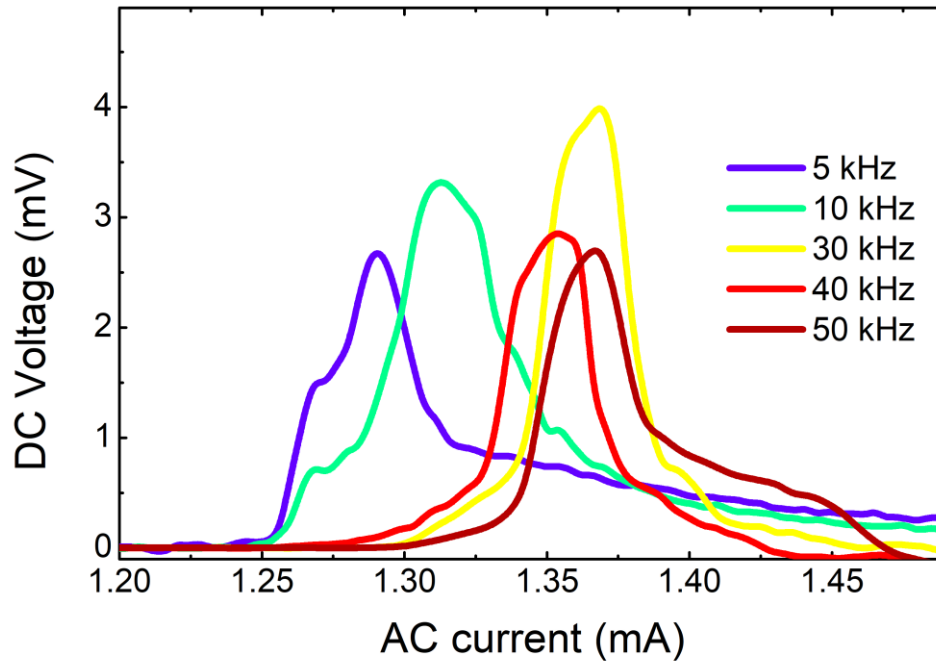

**Supplementary Fig. 9 | Frequency dependence of the superconducting diode effect.**

Rectification signals obtained at various AC frequencies. The magnetic field is 40 Oe.
