# Supplementary material for: Superconducting diode effect via conformal-mapped nanoholes
Source: PubMed Central journal article supplement (PMC8113273; doi:10.1038/s41467-021-23077-0), 2021-05-11
Supplement: 41467_2021_23077_MOESM3_ESM.pdf [file 41467_2021_23077_MOESM3_ESM.pdf]

## **Description of Additional Supplementary Files**

**Supplementary Movie 1 | Nonequivalent evolution of the superconducting condensate in a single period of sine-wave AC current.** Black dots are nanoscale holes in a conformal array. Blue indicates superconducting state, while red indicates normal state. Gray arrows denote directions of flux-quantum motion. In the 1<sup>st</sup> half-cycle with  $I > 0$ , the sample changes from the superconducting state into a complete normal state (with zero order parameter), while in the 2<sup>nd</sup> half-cycle with  $I < 0$ , the sample cannot fully reach the normal state.

**Supplementary Movie 2 | Nonequivalent temperature evolution in a single period of sine-wave AC current.** Video showing nonequivalent nucleation and evolution of hot spots with positive and negative current. Blue circles are nanoscale holes in a conformal array.

**Supplementary Movie 3 | Dynamic motion of flux-quanta driven by current in a pristine sample exposed to magnetic field.** Red dots (with zero order parameter) show flux-quanta. Video showing a dynamic gradient distribution of flux-quanta.
